# Supplementary material
Source: PubMed Central journal article supplement (PMC4609709)
Supplement: JCM.01001-15_zjm999094564so1.pdf [file JCM.01001-15_zjm999094564so1.pdf]

**Supplemental Table S1:** Single-nucleotide polymorphisms detected in the *pncA* gene, by country and resistance phenotype.

| SNP location | SNP type          | Codon Change        | Country and reference                                                                                                               | Phenotype linked to SNP                                 | Total Frequency             | Sensitive Frequency (%) |
|--------------|-------------------|---------------------|-------------------------------------------------------------------------------------------------------------------------------------|---------------------------------------------------------|-----------------------------|-------------------------|
| -125         | C insertion       | Upstream            | Europe (76)                                                                                                                         | S                                                       | 4                           | 100%                    |
| -125 & 195   | C insertion & C>T | Upstream & Ser65Ser | Europe (76)                                                                                                                         | S                                                       | 11                          | 100%                    |
| -124 & 195   | C deletion & C>T  | Upstream & Ser65Ser | Europe (76)                                                                                                                         | S                                                       | 1                           | 100%                    |
| -33          | G insertion       | Upstream            | Sweden (40)                                                                                                                         | S                                                       | 1                           | 100%                    |
| -13          | G>T               | Upstream            | Canada (73), Europe (76)                                                                                                            | R (73), S (76)                                          | 2                           | 50%                     |
| -7           | T>C               | Upstream            | Korea (6), USA (35), Thailand (55), Europe (76)                                                                                     | S (6), N/S (55), R (35,76)                              | 8                           | 12.5%                   |
| -3           | C insertion       | Upstream            | Sweden (40,61), Europe (76)                                                                                                         | S (40,76), *R/S (61)                                    | 4 (r/s – multicentre study) | 75%                     |
| 14           | T>C               | Ile5Thr             | China (72)                                                                                                                          | S                                                       | 1                           | 100%                    |
| 16           | A>C               | Ile6Leu             | Europe (76)                                                                                                                         | S                                                       | 128                         | 100%                    |
| 27           | G>C               | Val9Val             | Peru (14)                                                                                                                           | S                                                       | 1                           | 100%                    |
| 31           | A>G               | Asn11Asp            | China (72)                                                                                                                          | S                                                       | 1                           | 100%                    |
| 35           | A>C               | Asp12Ala            | Cambodia (5), USA (13), China (16,50,72), Japan (20), Korea (7,21), India (27,62), Mexico (28), Peru (34), Canada (73), Europe (76) | N/S (5,27), R (7,13,16,20,21,28,34,50,62,73,76), S (72) | 28                          | 7%                      |
| 35           | A>G               | Asp12Gly            | South Africa (3), Europe (76)                                                                                                       | R (3), S (76)                                           | 11                          | 18%                     |
| 40           | T>G               | Cys14Gly            | Korea (21), Peru (34), Belgium (45)                                                                                                 | S (21,45), R (34)                                       | 5                           | 20%                     |
| 49           | G>T               | Gly17Cys            | Kazakhstan (77)                                                                                                                     | S                                                       | 1                           | 100%                    |
| 62           | T>C               | Val21Ala            | Germany (75), Europe (76)                                                                                                           | N/S (75), S (76)                                        | 5                           | 80%                     |
| 82           | G>A               | Ala28Thr            | Netherlands (43)                                                                                                                    | S                                                       | 1                           | 100%                    |
| 92           | T>C               | Ile31Thr            | Thailand (9,55)                                                                                                                     | *R/S (9), N/S (55)                                      | 21                          | 43%                     |
| 92           | T>G               | Ile31Ser            | Thailand (9), Europe (76)                                                                                                           | *R/S (9), R (76)                                        | 5                           | 20%                     |
| 98           | A>C               | Asp33Ala            | Taiwan (19), China (36)                                                                                                             | S (19), R (36)                                          | 2                           | 50%                     |
| 104          | T>C               | Leu35Pro            | Thailand (9), India (27), China (36), Japan (49), Spain (63), Europe (76)                                                           | R (9,49,63,76), N/S (27), S (36)                        | 6                           | 17%                     |
| 104          | T>G               | Leu35Arg            | Brazil (24), China (72)                                                                                                             | R (24), S (72)                                          | 2                           | 50%                     |
| 114          | G>C               | Ala38Ala            | Europe (76)                                                                                                                         | S                                                       | 1                           | 100%                    |
| 117          | 2-bp insertion    | Frameshift          | Korea (6)                                                                                                                           | S                                                       | 1                           | 100%                    |
| 127          | C>T               | His43Tyr            | Netherlands (43)                                                                                                                    | S                                                       | 1                           | 100%                    |
| 134          | T>C               | Val45Ala            | Thailand (9), China (36), Europe (76)                                                                                               | R (9,36), S (76)                                        | 3                           | 33%                     |
| 137          | C>T               | Ala46Val            | Portugal (10), Canada (13,73), USA (13), Korea (13,21), Yemen (23), China (72), Europe (76)                                         | R (10,13,23,73), S (21,72,76)                           | 13                          | 23%                     |
| 139          | A>G               | Thr47Ala            | Korea (7), Mexico (28), China (33), USA (35,41,71), Sweden (40,67), Europe (76)                                                     | R (7,28,33,40,41), S (35,67,71,76)                      | 50                          | 80%                     |
| 143          | A>C               | Lys48Thr            | Korea (6), Peru (34), Cuba (60), Europe (76)                                                                                        | S (6), R (34,60,76)                                     | 10                          | 10%                     |
| 146          | A>C               | Asp49Ala            | Korea (7,21), Brazil (24), Belgium (45), Japan (49), Europe (76)                                                                    | R (7,21,45,49,76), *R/S (24)                            | 8                           | 12.5%                   |
| 147          | C>G               | Asp49Glu            | Brazil (24), Netherlands (43)                                                                                                       | S (24,43)                                               | 2                           | 100%                    |
| 188          | A>C               | Asp63Ala            | Mexico (28), Belgium (45), China (51), Russia (65), Singapore (69), Europe (76)                                                     | R (28,45,69,76), S (51), N/S (65)                       | 9                           | 11%                     |
| 191          | A>C               | Tyr64Ser            | Belgium (45), Europe (76)                                                                                                           | S (45), *R/S (76)                                       | 3                           | 67%                     |
| 193          | T>C               | Ser65Pro            | China (72)                                                                                                                          | S                                                       | 1                           | 100%                    |
| 195          | C>T               | Ser65Ser            | Iran (2), South Africa (3,66), Japan (20), India (27,53,64), Sweden (40,61,67), USA (41), Tanzania (55), Canada (73), Europe (76)   | R (2), S (3,20,40,41,53,61,64,66,67,73,76), N/S (27,55) | 76                          | 70%                     |

|                 |                 |                                   |                                                                                                                      |                                            |    |      |
|-----------------|-----------------|-----------------------------------|----------------------------------------------------------------------------------------------------------------------|--------------------------------------------|----|------|
| 195 & 152       | C>T & A>G       | Ser65Ser & His51Arg               | India (64)                                                                                                           | S                                          | 1  | 100% |
| 199             | T>C             | Ser67Pro                          | Korea (6,7), Thailand (9), Canada (23), Sweden (40), China (50,51), Canada (73), Europe (76)                         | R <sup>7,9,23,40,50,51,73,76</sup> , S (6) | 10 | 10%  |
| 201             | TCG insertion   | Frameshift                        | China (72)                                                                                                           | S                                          | 1  | 100% |
| 234             | C>T             | Gly78Gly                          | China (51)                                                                                                           | S                                          | 1  | 100% |
| 245             | A>G             | His82Arg                          | USA (13), Brazil (18), China (36,72), Belgium (45), New Zealand (48), Europe (76)                                    | R (13,18,45,48,72,76), *R/S (36)           | 12 | 8%   |
| 277             | G>A             | Val93Met                          | Kazakhstan (77)                                                                                                      | S                                          | 1  | 100% |
| 290             | G>A             | Gly97Asp                          | South Africa (3), Japan (17), Taiwan (19,31), USA (35), China (36,72), New Zealand (48), Singapore (69), Europe (76) | R (3,17,19,31,35,36,48,69,76), S (72)      | 13 | 8%   |
| 304-306         | GCG>AGA         | Ala102Arg                         | Europe (76)                                                                                                          | S                                          | 1  | 100% |
| 304             | G>C             | Ala102Pro                         | Cambodia (5), Europe (76)                                                                                            | N/S (5), S (76)                            | 3  | 33%  |
| 305             | C>T             | Ala102Val                         | South Africa (3,66), Russia (4), China (36,72), Europe (76)                                                          | R (3,4,36,66), S (72,76)                   | 10 | 40%  |
| 309             | C>G             | Tyr103STOP                        | Russia (4), Korea (7,21), Brazil (18), South Africa (25), Peru (34), USA (35), Europe (76)                           | R (4,7,18,25,34,35,76), S (21)             | 17 | 6%   |
| 341             | C>T             | Thr114Met                         | South Africa (25)                                                                                                    | S                                          | 10 | 100% |
| 347             | T>C             | Leu116Pro                         | Peru (34), Italy (42), China (72), Europe (76)                                                                       | R (34,42,76), *R/S (72)                    | 5  | 20%  |
| 371             | G>A             | Gly124Asp                         | Netherlands (43)                                                                                                     | S                                          | 1  | 100% |
| 382             | G>T             | Val128Phe                         | China (72)                                                                                                           | S                                          | 1  | 100% |
| 389             | T>C             | Val130Ala                         | Korea (1,21), China (36,50), Europe (76)                                                                             | R (1,36,50,76), S (21)                     | 5  | 20%  |
| 401             | C>T             | Ala134Val                         | Canada (13), Peru (14), Taiwan (19,31), USA (35), Russia (65), China (72), Europe (76)                               | R (13,14,19,31,35,76), N/S (65), S (72)    | 9  | 11%  |
| 403             | A>C             | Thr135Pro                         | Korea (1,7,8,21), China (33), Peru (34), USA (35), Belgium (45), Japan (49), Cuba (60), Poland (75), Europe (76)     | R (1,7,8,21,33,34,35,49,75,76), S (45,60)  | 41 | 5%   |
| 404             | C>G             | Thr135Ser                         | Europe (76)                                                                                                          | S                                          | 1  | 100% |
| 407             | A>G             | Asp136Gly                         | Cambodia (5), Korea (8,21), South Africa (25), China (33,72), Peru (34), Thailand (55), Europe (76)                  | N/S (5,55), R (8,21,25,33,72), S (34,76)   | 11 | 27%  |
| 410             | A>G             | His137Cys                         | USA (35), Europe (76)                                                                                                | R (35), S (76)                             | 4  | 50%  |
| 419             | G>A             | Arg140His                         | Japan (15), South Korea (47)                                                                                         | S (15), N/S (47)                           | 3  | 66%  |
| 419 & 493       | G>A & G>A       | Arg140His & Ala165Thr             | Japan (15)                                                                                                           | S                                          | 2  | 100% |
| 419 & 450 & 493 | G>A & C>A & G>A | Arg140His & Gly150Gly & Ala165Thr | Japan (15)                                                                                                           | S                                          | 1  | 100% |
| 427             | G>A             | Ala143Thr                         | Iran (2), Belgium (45), Europe (76)                                                                                  | R (2), S (45,76)                           | 4  | 75%  |
| 460             | A>G             | Arg154Gly                         | Korea (1), South Africa (3,66), Russia (4), China (36,72), Europe (76)                                               | R (1,3,4,36,66), S (72), *R/S (76)         | 8  | 25%  |
| 462             | G>T             | Arg154Ser                         | Europe (76)                                                                                                          | S                                          | 3  | 100% |
| 464             | T>C             | Val155Ala                         | Korea <sup>6,21</sup> , Peru (14), China <sup>72</sup>                                                               | S (6,72), N/S (14), *R/S (21)              | 6  | 66%  |
| 470             | T>G             | Val157Gly                         | Korea (1), China (72), Europe (76)                                                                                   | R (1,76), S (72)                           | 4  | 25%  |
| 475             | C>G             | Leu159Val                         | Europe (76)                                                                                                          | S                                          | 1  | 100% |
| 478             | A>G             | Thr160Ala                         | China (72), Europe (76)                                                                                              | S (72), R (76)                             | 2  | 50%  |
| 503             | C>T             | Thr168Ile                         | Europe (76)                                                                                                          | S                                          | 2  | 100% |
| 511             | G>A             | Ala171Thr                         | Portugal (10), Bangladesh (11), USA (35), China (72)                                                                 | R (10,11,35), S (72)                       | 4  | 25%  |
| 512             | C>T             | Ala171Val                         | Scotland (11), China (72), Canada (73), Europe (76)                                                                  | S (11,76), *R/S (72), R (73)               | 6  | 67%  |
| 521             | A>G             | Glu174Gly                         | China (33,54)                                                                                                        | R (33), S (54)                             | 2  | 50%  |

|     |     |            |                                                                                            |                                      |    |      |
|-----|-----|------------|--------------------------------------------------------------------------------------------|--------------------------------------|----|------|
| 523 | A>G | Met175Val  | Japan (20), Brazil (24), China (36), Belgium (45), Thailand (55), Poland (75), Europe (76) | R (20,24,45,75,76), S (36), N/S (55) | 14 | 7%   |
| 525 | G>A | Met175Ile  | Korea (6), China (33), Belgium (45), Brazil (57), Europe (76)                              | S (6), *R/S (45), R (33,57,76)       | 15 | 13%  |
| 529 | A>C | Thr177Pro  | Taiwan (19), China (36)                                                                    | R (19), S (36)                       | 2  | 50%  |
| 545 | T>C | Leu182Ser  | Korea (21), France (39), Europe (76)                                                       | S (21), R (39,76)                    | 3  | 33%  |
| 545 | T>G | Leu182Trp  | Europe (76)                                                                                | S                                    | 1  | 100% |
| 559 | T>G | STOP187Gly | India (53), Sweden (61)                                                                    | R (53), S (61)                       | 2  | 50%  |
| 559 | T>C | STOP187Arg | China (72)                                                                                 | S                                    | 1  | 100% |

Abbreviations: Ala, Alanine; Arg, Arginine; Asn, Asparagine; Asp, Aspartate; bp, base pair; Cys, Cysteine; Glu, Glutamate; Gln, Glutamine; Gly, Glycine; His, Histidine; Ile, Isoleucine; Leu, Leucine; Lys, Lysine; Met, Methionine; N/S, not stated; Phe, Phenylalanine; Pro, Proline; R, resistant; S, susceptible; Ser, Serine; SNP, single-nucleotide polymorphism; Thr, Threonine; Trp, Tryptophan; Tyr, Tyrosine; Val, Valine. \* Article reported one isolate sensitive and one isolate resistant.

We searched PubMed, ScienceDirect and Scopus on July 14, 2014 for relevant articles published in the English language between 1998 and 2014 using an *a priori* protocol. The search terms “tuberculosis AND (pyrazinamide OR PZA) AND (phenotype OR genotype OR PZase OR pyrazinamidase OR *pncA* OR BACTEC OR mutations OR resistance OR resistant OR susceptibility OR sequence analysis OR microbial sensitivity tests OR molecular typing)” were used to identify articles reporting on PZA resistance using any of the methods of interest: phenotypic PZA DST, PZase activity assays, and/or genotypic PZA assays. Additional articles were identified from reference lists and review articles. Studies were eligible for inclusion if they performed genotypic testing using polymerase chain reaction (PCR) or DNA sequencing and characterized the found SNPs. The characterized SNPs also needed to have a phenotypic result, only phenotypic results from the BACTEC liquid-based DST 460 or 960, considered the reference standard for PZA DST, or PZase activity assays using classic or modified Wayne’s methods were considered.

## References

1. **Kim, H. J., Kwak, H. K., Lee, J., Yun, Y. J., Lee, J. S., Lee, M. S., Min, S. Y., Park, S. K., Kang, H. S., Maeng, Y. H., Kim, S. Y., Kim, S. Y., Kook, Y. H., Kim, Y. R., Lee, K. H.** 2012. Patterns of *pncA* mutations in drug-resistant *Mycobacterium tuberculosis* isolated from patients in South Korea. *International Journal of Tuberculosis and Lung Disease* **16**:98-103.
2. **Doustdar, F., Khosravi, A. D., Farnia, P.** 2009. *Mycobacterium tuberculosis* Genotypic Diversity in Pyrazinamide-Resistant Isolates of Iran. *Microbial Drug Resistance* **15**:251-256.
3. **Mphahlele, M., Syre, H., Valvatne, H., Stavrum, R., Mannsaker, T., Muthivhi, T., Weyer, K., Fourie, P. B., Grewal, H. M. S.** 2008. Pyrazinamide resistance among South African multidrug-resistant *Mycobacterium tuberculosis* isolates. *Journal of Clinical Microbiology* **46**:3459-3464.
4. **Marttila, H. J., Marjamaki, M., Vyshnevskaya, E., Vyshnevskiy, B. I., Otten, T. F., Vasilyef, A. V., Viljanen, M. K.** 1999. *pncA* mutations in pyrazinamide-resistant *Mycobacterium tuberculosis* isolates from northwestern Russia. *Antimicrobial Agents and Chemotherapy* **43**:1764-1766.
5. **Pierre-Audigier, C., Surcouf, C., Cadet-Daniel, V., Namouchi, A., Heng, S., Murray, A., Guillard, B., Gicquel, B.** 2012. Fluoroquinolone and pyrazinamide resistance in multidrug-resistant tuberculosis. *International Journal of Tuberculosis and Lung Disease* **16**:221-223.
6. **Choi, J.-H., Lee, K. W., Kang, H.-R., Hwang, Y. I., Jang, S., Kim, D.-G., Kim, C.-H., Hyun, I.-G., Shin, T.-R., Park, S.-M., Lee, M.-G., Lee, C.-Y., Park, Y.-B., Jung, K.-S.** 2010. Clinical Efficacy of Direct DNA Sequencing Analysis on Sputum Specimens for Early Detection of Drug-Resistant *Mycobacterium tuberculosis* in a Clinical Setting. *Chest* **137**:393-400.
7. **Lee, K. W., Lee, J. M., Jung, K. S.** 2001. Characterization of *pncA* mutations of pyrazinamide-resistant *Mycobacterium tuberculosis* in Korea. *Journal of Korean Medical Science* **16**:537-543.
8. **Park, S. K., Lee, J. Y., Chang, C. L., Lee, M. K., Son, H. C., Kim, C. M., Jang, H. J., Park, H. K., Jeong, S. H.** 2001. *pncA* mutations in clinical *Mycobacterium tuberculosis* isolates from Korea. *Bmc Infectious Diseases* **1**:art. no.-4.
9. **Jonmalung, J., Prammananan, T., Leechawengwongs, M., Chaiprasert, A.** 2010. Surveillance of pyrazinamide susceptibility among multidrug-resistant *Mycobacterium tuberculosis* isolates from Siriraj Hospital, Thailand. *BMC Microbiol* **10**:223.
10. **Portugal, I., Barreiro, L., Moniz-Pereira, J., Brum, L.** 2004. *pncA* mutations in pyrazinamide-resistant *Mycobacterium tuberculosis* isolates in Portugal. *Antimicrobial Agents and Chemotherapy* **48**:2736-2738.
11. **Mestdagh, M., Fonteyne, P. A., Realini, L., Rossau, R., Jannes, G., Mijs, W., De Smet, K. A. L., Portaels, F., Van den Eeckhout, E.** 1999. Relationship between pyrazinamide resistance, loss of pyrazinamidase activity, and mutations in the *pncA* locus in multidrug-resistant clinical isolates of *Mycobacterium tuberculosis*. *Antimicrobial Agents and Chemotherapy* **43**:2317-2319.
12. **Barco, P., Cardoso, R. F., Hirata, R. D. C., Leite, C. Q. F., Pandolfi, J. R., Sato, D. N., Shikama, M. L., de Melo, F. F., Mamizuka, E. M., Campanerut, P. A. Z., Hirata, M. H.** 2006. *pncA* mutations in pyrazinamide-resistant *Mycobacterium tuberculosis* clinical isolates from the southeast region of Brazil. *Journal of Antimicrobial Chemotherapy* **58**:930-935.

13. **Cheng, S. J., Thibert, L., Sanchez, T., Heifets, L., Zhang, Y.** 2000. *pncA* mutations as a major mechanism of pyrazinamide resistance in *Mycobacterium tuberculosis*: Spread of a monoresistant strain in Quebec, Canada. *Antimicrobial Agents and Chemotherapy* **44**:528-532.
14. **Escalante, P., Ramaswamy, S., Sanabria, H., Soini, H., Pan, X., Valiente-Castillo, O., Musser, J. M.** 1998. Genotypic characterization of drug-resistant *Mycobacterium tuberculosis* isolates from Peru. *Tubercle and lung disease : the official journal of the International Union against Tuberculosis and Lung Disease* **79**:111-118.
15. **Ando, H., Mitarai, S., Kondo, Y., Suetake, T., Sekiguchi, J. I., Kato, S., Mori, T., Kirikae, T.** 2010. Pyrazinamide resistance in multidrug-resistant *Mycobacterium tuberculosis* isolates in Japan. *Clinical microbiology and infection : the official publication of the European Society of Clinical Microbiology and Infectious Diseases* **16**:1164-1168.
16. **Hou, L., Osei-Hyiaman, D., Zhang, Z., Wang, B., Yang, A., Kano, K.** 2000. Molecular characterization of *pncA* gene mutations in *Mycobacterium tuberculosis* clinical isolates from China. *Epidemiology and Infection* **124**:227-232.
17. **Miyagi, C., Yamane, N., Yogesh, B., Ano, H., Takashima, T.** 2004. Genetic and phenotypic characterization of pyrazinamide-resistant *Mycobacterium tuberculosis* complex isolates in Japan. *Diagnostic Microbiology and Infectious Disease* **48**:111-116.
18. **Rodrigues, V., Telles, M. A., Ribeiro, M. O., Cafrune, P. U., Rossetti, M. L. R., Zaha, A.** 2005. Characterization of *pncA* mutations in pyrazinamide-resistant *Mycobacterium tuberculosis* in Brazil. *Antimicrobial Agents and Chemotherapy* **49**:444-446.
19. **Chiu, Y.-C., Huang, S.-F., Yu, K.-W., Lee, Y.-C., Feng, J.-Y., Su, W.-J.** 2011. Characteristics of *pncA* mutations in multidrug-resistant tuberculosis in Taiwan. *Bmc Infectious Diseases* **11**.
20. **Sekiguchi, J.-i., Miyoshi-Akiyama, T., Augustynowicz-Kopec, E., Zwolska, Z., Kirikae, F., Toyota, E., Kobayashi, I., Morita, K., Kudo, K., Kato, S., Kuratsuji, T., Mori, T., Kirikae, T.** 2007. Detection of multidrug resistance in *Mycobacterium tuberculosis*. *Journal of Clinical Microbiology* **45**:179-192.
21. **Jnawali, H. N., Hwang, S. C., Park, Y. K., Kim, H., Lee, Y. S., Chung, G. T., Choe, K. H., Ryoo, S.** 2013. Characterization of mutations in multi- and extensive drug resistance among strains of *Mycobacterium tuberculosis* clinical isolates in Republic of Korea. *Diagnostic Microbiology and Infectious Disease* **76**:187-196.
22. **Bishop, K. S., Blumberg, L., Trollip, A. P., Smith, A. N., Roux, L., York, D. F., Kiepiela, P.** 2001. Characterisation of the *pncA* gene in *Mycobacterium tuberculosis* isolates from Gauteng, South Africa. *International Journal of Tuberculosis and Lung Disease* **5**:952-957.
23. **Hirano, K., Takahashi, M., Kazumi, Y., Fukasawa, Y., Abe, C.** 1998. Mutation in *pncA* is a major mechanism of pyrazinamide resistance in *Mycobacterium tuberculosis*. *Tubercle and Lung Disease* **78**:117-122.
24. **Bhujju, S., Fonseca, L. d. S., Marsico, A. G., de Oliveira Vieira, G. B., Sobral, L. F., Stehr, M., Singh, M., Feres Saad, M. H.** 2013. *Mycobacterium tuberculosis* isolates from Rio de Janeiro reveal unusually low correlation between pyrazinamide resistance and mutations in the *pncA* gene. *Infection Genetics and Evolution* **19**:1-6.
25. **Louw, G. E., Warren, R. M., Donald, P. R., Murray, M. B., Bosman, M., Van Heiden, P. D., Young, D. B., Victor, T. C.** 2006. Frequency and implications of pyrazinamide resistance in managing previously treated tuberculosis patients. *International Journal of Tuberculosis and Lung Disease* **10**:802-807.
26. **Tracevska, T., Jansone, I., Baumanis, V., Nodieva, A., Marga, O., Skenders, G.** 2004. Spectrum of *pncA* mutations in multidrug-resistant *Mycobacterium tuberculosis* isolates obtained in Latvia. *Antimicrobial Agents and Chemotherapy* **48**:3209-3210.
27. **Stavrum, R., Myneedu, V. P., Arora, V. K., Ahmed, N., Grewal, H. M. S.** 2009. In-Depth Molecular Characterization of *Mycobacterium tuberculosis* from New Delhi - Predominance of Drug Resistant Isolates of the 'Modern' (TbD1(-)) Type. *Plos One* **4**.
28. **Cuevas-Cordoba, B., Oyuki Xochihua-Gonzalez, S., Cuellar, A., Fuentes-Dominguez, J., Zenteno-Cuevas, R.** 2013. Characterization of *pncA* gene mutations in pyrazinamide-resistant *Mycobacterium tuberculosis* isolates from Mexico. *Infection Genetics and Evolution* **19**:330-334.
29. **Yuksel, P., Tansel, O.** 2009. Characterization of *pncA* mutations of pyrazinamide-resistant *Mycobacterium tuberculosis* in Turkey. *New Microbiologica* **32**:153-158.
30. **Chan, R. C. Y., Hui, M., Chan, E. W. C., Au, T. K., Chin, M. L., Yip, C. K., AuYeang, C. K. W., Yeung, C. Y. L., Kam, K. M., Yip, P. C. W., Cheng, A. E. B.** 2007. Genetic and phenotypic characterization of drug-resistant *Mycobacterium tuberculosis* isolates in Hong Kong. *Journal of Antimicrobial Chemotherapy* **59**:866-873.
31. **Huang, T. S., Lee, S. S. J., Tu, H. Z., Huang, W. K., Chen, Y. S., Huang, C. K., Wann, S. R., Lin, H. H., Liu, Y. C.** 2003. Correlation between pyrazinamide activity and *pncA* mutations in

- Mycobacterium tuberculosis* isolates in Taiwan. Antimicrobial Agents and Chemotherapy **47**:3672-3673.
32. **Davies, A. P., Billington, O. J., McHugh, T. D., Mitchison, D. A., Gillespie, S. H.** 2000. Comparison of phenotypic and genotypic methods for pyrazinamide susceptibility testing with *Mycobacterium tuberculosis*. Journal of Clinical Microbiology **38**:3686-3688.
  33. **Tan, Y., Hu, Z., Zhang, T., Cai, X., Kuang, H., Liu, Y., Chen, J., Yang, F., Zhang, K., Tan, S., Zhao, Y.** 2014. Role of *pncA* and *rpsA* Gene Sequencing in Detection of Pyrazinamide Resistance in *Mycobacterium tuberculosis* Isolates from Southern China. Journal of Clinical Microbiology **52**:291-297.
  34. **Sheen, P., Mendez, M., Gilman, R. H., Pena, L., Caviedes, L., Zimic, M. J., Zhang, Y., Moore, D. A. J., Evans, C. A.** 2009. Sputum PCR-Single-Strand Conformational Polymorphism Test for Same-Day Detection of Pyrazinamide Resistance in Tuberculosis Patients. Journal of Clinical Microbiology **47**:2937-2943.
  35. **Morlock, G. P., Crawford, J. T., Butler, W. R., Brim, S. E., Sikes, D., Mazurek, G. H., Woodley, C. L., Cooksey, R. C.** 2000. Phenotypic characterization of *pncA* mutants of *Mycobacterium tuberculosis*. Antimicrobial Agents and Chemotherapy **44**:2291-2295.
  36. **Huang, Z.-k., Luo, Q., Jiang, B.-x., Li, W.-t., Xu, X.-m., Xiong, G.-l., Li, J.-m.** 2013. Performance of the microscopic observation drug susceptibility assay in pyrazinamide susceptibility testing for *Mycobacterium tuberculosis*. Chinese Medical Journal **126**:4334-4339.
  37. **Perdigao, J., Macedo, R., Joao, I., Fernandes, E., Brum, L., Portugal, I.** 2008. Multidrug-resistant tuberculosis in Lisbon, Portugal: A molecular epidemiological perspective. Microbial Drug Resistance **14**:133-143.
  38. **Endoh, T., Yagihashi, A., Uehara, N., Kobayashi, D., Tsuji, N., Nakamura, M., Hayashi, S., Fujii, N., Watanabe, N.** 2002. Pyrazinamide resistance associated with *pncA* gene mutation in *Mycobacterium tuberculosis* in Japan. Epidemiology and Infection **128**:337-342.
  39. **Lemaitre, N., Sougakoff, W., Truffot-Pernot, C., Jarlier, V.** 1999. Characterization of new mutations in pyrazinamide-resistant strains of *Mycobacterium tuberculosis* and identification of conserved regions important for the catalytic activity of the pyrazinamidase *PncA*. Antimicrobial Agents and Chemotherapy **43**:1761-1763.
  40. **Jureen, P., Werngren, J., Toro, J.-C., Hoffner, S.** 2008. Pyrazinamide resistance and *pncA* gene mutations in *Mycobacterium tuberculosis*. Antimicrobial Agents and Chemotherapy **52**:1852-1854.
  41. **Denkin, S., Volokhov, D., Chizhikov, V., Zhang, Y.** 2005. Microarray-based *pncA* genotyping of pyrazinamide-resistant strains of *Mycobacterium tuberculosis*. Journal of Medical Microbiology **54**:1127-1131.
  42. **Piersimoni, C., Mustazzolu, A., Giannoni, F., Bornigia, S., Gherardi, G., Fattorini, L.** 2013. Prevention of False Resistance Results Obtained in Testing the Susceptibility of *Mycobacterium tuberculosis* to Pyrazinamide with the Bactec MGIT 960 System Using a Reduced Inoculum. Journal of Clinical Microbiology **51**:291-294.
  43. **Simons, S. O., van Ingen, J., van der Laan, T., Mulder, A., Dekhuijzen, P. N. R., Boeree, M. J., van Soolingen, D.** 2012. Validation of *pncA* Gene Sequencing in Combination with the Mycobacterial Growth Indicator Tube Method To Test Susceptibility of *Mycobacterium tuberculosis* to Pyrazinamide. Journal of Clinical Microbiology **50**:428-434.
  44. **Zhdanova, S., Heysell, S. K., Ogarkov, O., Boyarinova, G., Alexeeva, G., Pholwat, S., Zorkaltseva, E., Hout, E. R., Savilov, E.** 2013. Primary Multidrug-Resistant *Mycobacterium tuberculosis* in 2 Regions, Eastern Siberia, Russian Federation. Emerging Infectious Diseases **19**:1649-1652.
  45. **Stoffels, K., Mathys, V., Fauville-Dufaux, M., Wintjens, R., Bifani, P.** 2012. Systematic Analysis of Pyrazinamide-Resistant Spontaneous Mutants and Clinical Isolates of *Mycobacterium tuberculosis*. Antimicrobial Agents and Chemotherapy **56**:5186-5193.
  46. **Brown, T. J., Tansel, O., French, G. L.** 2000. Simultaneous identification and typing of multi-drug-resistant *Mycobacterium tuberculosis* isolates by analysis of *pncA* and *rpoB*. Journal of Medical Microbiology **49**:651-656.
  47. **Lee, J., Yun, Y.-J., Kqueen, C. Y., Lee, J. H., Kim, H.-Y., Kim, Y. R., Kook, Y.-H., Lee, K. H.** 2012. *pncA* Mutations in the Specimens from Extrapulmonary Tuberculosis. Tuberculosis and respiratory diseases **72**:475-480.
  48. **Pandey, S., Newton, S., Upton, A., Roberts, S., Drinkovic, D.** 2009. Characterisation of *pncA* mutations in clinical *Mycobacterium tuberculosis* isolates in New Zealand. Pathology **41**:582-584.
  49. **Suzuki, Y., Suzuki, A., Tamaru, A., Katsukawa, C., Oda, H.** 2002. Rapid detection of pyrazinamide-resistant *Mycobacterium tuberculosis* by a PCR-based *in vitro* system. Journal of Clinical Microbiology **40**:501-507.
  50. **Zhang, H., Bi, L. J., Li, C. Y., Sun, Z. G., Deng, J. Y., Zhang, X. E.** 2009. Mutations Found in the *pncA* Gene of *Mycobacterium tuberculosis* in Clinical Pyrazinamide-resistant Isolates from a Local Region of China. Journal of International Medical Research **37**:1430-1435.

51. **Zhou, M., Geng, X., Chen, J., Wang, X., Wang, D., Deng, J., Zhang, Z., Wang, W., Zhang, X.-E., Wei, H.** 2011. Rapid Colorimetric Testing for Pyrazinamide Susceptibility of *M. tuberculosis* by a PCR-Based *In-Vitro* Synthesized Pyrazinamidase Method. *Plos One* **6**.
52. **Ghiraldi, L. D., Campanerut, P. A. Z., Sposito, F. L. E., Sato, D. N., Leite, C. Q. F., Hirata, M., Hirata, R. D. C., Cardoso, R. F.** 2011. Evaluation of the microscopic observation drug susceptibility assay for detection of *Mycobacterium tuberculosis* resistance to pyrazinamide. *Clinical Microbiology and Infection* **17**:1792-1797.
53. **Shenai, S., Rodrigues, C., Sadani, M., Sukhadia, N., Mehta, A.** 2009. Comparison of phenotypic and genotypic methods for pyrazinamide susceptibility testing. *The Indian journal of tuberculosis* **56**:82-90.
54. **Li, H., Chen, J., Zhou, M., Geng, X., Yu, J., Wang, W., Zhang, X.-E., Wei, H.** 2014. Rapid Detection of *Mycobacterium tuberculosis* and Pyrazinamide Susceptibility Related to *pncA* Mutations in Sputum Specimens through an Integrated Gene-to-Protein Function Approach. *Journal of Clinical Microbiology* **52**:260-267.
55. **Pholwat, S., Stroup, S., Gratz, J., Trangan, V., Foongladda, S., Kumburu, H., Juma, S. P., Kibiki, G., Houpt, E.** 2014. Pyrazinamide susceptibility testing of *Mycobacterium tuberculosis* by high resolution melt analysis. *Tuberculosis* **94**:20-25.
56. **Aono, A., Hirano, K., Hamasaki, S., Abe, C.** 2002. Evaluation of BACTEC MGIT 960 PZA medium for susceptibility testing of *Mycobacterium tuberculosis* to pyrazinamide (PZA): compared with the results of pyrazinamidase assay and Kyokuto PZA test. *Diagnostic Microbiology and Infectious Disease* **44**:347-352.
57. **Clemente, W. T., Soares Lima, S. S., Palaci, M., Silva, M. S. N., Sumnienski Rodrigues, V. F., Dalla Costa, E. R., Possuelo, L., Cafrune, P. I., Ribeiro, F. K., Gomes, H. M., Serufo, J. C.** 2008. Phenotypic and genotypic characterization of drug-resistant *Mycobacterium tuberculosis* strains. *Diagnostic Microbiology and Infectious Disease* **62**:199-204.
58. **Minime-Lingoupou, F., Pierre-Audigier, C., Kassa-Kelembho, E., Barilone, N., Zandanga, G., Rauzier, J., Cadet-Daniel, V., Le Faou, A., Gicquel, B.** 2010. Rapid identification of multidrug-resistant tuberculosis isolates in treatment failure or relapse patients in Bangui, Central African Republic. *International Journal of Tuberculosis and Lung Disease* **14**:782-785.
59. **Hannan, M. M., Desmond, E. P., Morlock, G. P., Mazurek, G. H., Crawford, J. T.** 2001. Pyrazinamide-mono-resistant *Mycobacterium tuberculosis* in the United States. *Journal of Clinical Microbiology* **39**:647-650.
60. **Mirabal, N. C., Yzquierdo, S. L., Lemus, D., Madruga, M., Milian, Y., Echemendia, M., Takiff, H., Martin, A., van der Stuyf, P., Palomino, J. C., Montoro, E.** 2010. Evaluation of Colorimetric Methods Using Nicotinamide for Rapid Detection of Pyrazinamide Resistance in *Mycobacterium tuberculosis*. *Journal of Clinical Microbiology* **48**:2729-2733.
61. **Hoffner, S., Angeby, K., Sturegard, E., Jonsson, B., Johansson, A., Sellin, M., Werngren, J.** 2013. Proficiency of drug susceptibility testing of *Mycobacterium tuberculosis* against pyrazinamide: the Swedish experience. *International Journal of Tuberculosis and Lung Disease* **17**:1486-1490.
62. **Muthaiah, M., Jagadeesan, S., Ayalusamy, N., Sreenivasan, M., Prabhu, S. S., Muthuraj, U., Senthilkumar, K., Veerappan, S.** 2010. Molecular Epidemiological Study of Pyrazinamide-Resistance in Clinical Isolates of *Mycobacterium tuberculosis* from South India. *International Journal of Molecular Sciences* **11**:2670-2680.
63. **Aragon, L. M., Garrigo, M., Moreno, C., Espanol, M., Coll, P.** 2007. Evaluation of the BacT/ALERT PZA kit in comparison with the BACTEC 460TB PZA for testing *Mycobacterium tuberculosis* susceptibility to pyrazinamide. *Journal of Antimicrobial Chemotherapy* **60**:655-657.
64. **Harris, K. A., Jr., Mukundan, U., Musser, J. M., Kreiswirth, B. N., Lalitha, M. K.** 2000. Genetic diversity and evidence for acquired antimicrobial resistance in *Mycobacterium tuberculosis* at a large hospital in South India. *International journal of infectious diseases : IJID : official publication of the International Society for Infectious Diseases* **4**:140-147.
65. **Shemyakin, I. G., Stepanshina, V. N., Ivanov, I. Y., Lipin, M. Y., Anisimova, V. A., Onasenko, A. G., Korobova, O. V., Shinnick, T. M.** 2004. Characterization of drug-resistant isolates of *Mycobacterium tuberculosis* derived from Russian inmates. *International Journal of Tuberculosis and Lung Disease* **8**:1194-1203.
66. **Daum, L. T., Rodriguez, J. D., Worthy, S. A., Ismail, N. A., Omar, S. V., Dreyer, A. W., Fourie, P. B., Hoosen, A. A., Chambers, J. P., Fischer, G. W.** 2012. Next-Generation Ion Torrent Sequencing of Drug Resistance Mutations in *Mycobacterium tuberculosis* Strains. *Journal of Clinical Microbiology* **50**:3831-3837.
67. **Werngren, J., Sturegard, E., Jureen, P., Angeby, K., Hoffner, S., Schon, T.** 2012. Reevaluation of the Critical Concentration for Drug Susceptibility Testing of *Mycobacterium tuberculosis* against Pyrazinamide Using Wild-Type MIC Distributions and *pncA* Gene Sequencing. *Antimicrobial Agents and Chemotherapy* **56**:1253-1257.

68. **Mpagama, S. G., Houpt, E. R., Stroup, S., Kumburu, H., Gratz, J., Kibiki, G. S., Heysell, S. K.** 2013. Application of quantitative second-line drug susceptibility testing at a multidrug-resistant tuberculosis hospital in Tanzania. *Bmc Infectious Diseases* **13**.
69. **Lee, A. S. G., Tang, L. L. H., Lim, I. H. K., Wong, S. Y.** 2002. Characterization of pyrazinamide and ofloxacin resistance among drug resistant *Mycobacterium tuberculosis* isolates from Singapore. *International journal of infectious diseases : IJID : official publication of the International Society for Infectious Diseases* **6**:48-51.
70. **Ioerger, T. R., Koo, S., No, E.-G., Chen, X., Larsen, M. H., Jacobs, W. R., Jr., Pillay, M., Sturm, A. W., Sacchettini, J. C.** 2009. Genome Analysis of Multi- and Extensively-Drug-Resistant Tuberculosis from KwaZulu-Natal, South Africa. *Plos One* **4**.
71. **Dormandy, J., Somoskovi, A., Kreistvirth, B. N., Driscoll, J. R., Ashkin, D., Salfinger, M.** 2007. Discrepant results between pyrazinamide susceptibility testing by the reference BACTEC 460TB method and *pncA* DNA sequencing in patients infected with multidrug-resistant W-Beijing *Mycobacterium tuberculosis* strains. *Chest* **131**:497-501.
72. **Cui, Z., Wang, J., Lu, J., Huang, X., Zheng, R., Hu, Z.** 2013. Evaluation of Methods for Testing the Susceptibility of Clinical *Mycobacterium tuberculosis* Isolates to Pyrazinamide. *Journal of Clinical Microbiology* **51**:1374-1380.
73. **Alexander, D. C., Ma, J. H., Guthrie, J. L., Blair, J., Chedore, P., Jamieson, F. B.** 2012. Gene Sequencing for Routine Verification of Pyrazinamide Resistance in *Mycobacterium tuberculosis*: a Role for *pncA* but Not *rpsA*. *Journal of Clinical Microbiology* **50**:3726-3728.
74. **Watcharasamphankul, W., Houpt, E. R., Foongladda, S.** 2013. Rapid detection of pyrazinamide resistant *Mycobacterium tuberculosis* by high resolution melting curve analysis. *Journal of the Medical Association of Thailand = Chotmaihet thangphaet* **96**:1218-1223.
75. **Napiorkowska, A., Ruesch-Gerdes, S., Hillemann, D., Richter, E., Augustynowicz-Kopec, E.** 2014. Characterisation of pyrazinamide-resistant *Mycobacterium tuberculosis* strains isolated in Poland and Germany. *International Journal of Tuberculosis and Lung Disease* **18**:454-460.
76. **Miotto, P., Cabibbe, A. M., Feuerriegel, S., Casali, N., Drobniewski, F., Rodionova, Y., Bakonyte, D., Stakenas, P., Pimkina, E., Augustynowicz-Kopec, E., Degano, M., Ambrosi, A., Hoffner, S., Mansjo, M., Werngren, J., Ruesch-Gerdes, S., Niemann, S., Cirillo, D. M.** 2014. *Mycobacterium tuberculosis* Pyrazinamide Resistance Determinants: a Multicenter Study. *Mbio* **5**.
77. **Akhmetova, A., Kozhamkulov, U., Bismilda, V., Chingissova, L., Abildaev, T., Dymova, M., Filipenko, M., Ramanculov, E.** 2015. Mutations in the *pncA* and *rpsA* genes among 77 *Mycobacterium tuberculosis* isolates in Kazakhstan. *The International Journal of Tuberculosis and Lung Disease* **19**:179-184.
